# Supplementary material for: Inhibition of Indigoidine Synthesis as a High-Throughput Colourimetric Screen for Antibiotics Targeting the Essential Mycobacterium tuberculosis Phosphopantetheinyl Transferase PptT
Source: MDPI journal article supplement (doi:10.3390/pharmaceutics13071066), 2021-07-12
Supplement: s1 [file s1]

# Supplementary Materials: Inhibition of Indigoidine Synthesis as a High-Throughput Colourimetric Screen for Antibiotics Targeting the Essential *Mycobacterium tuberculosis* Phosphopantetheinyl Transferase PptT

Alistair S. Brown, Jeremy G. Owen, James Jung, Edward N. Baker and David F. Ackerley

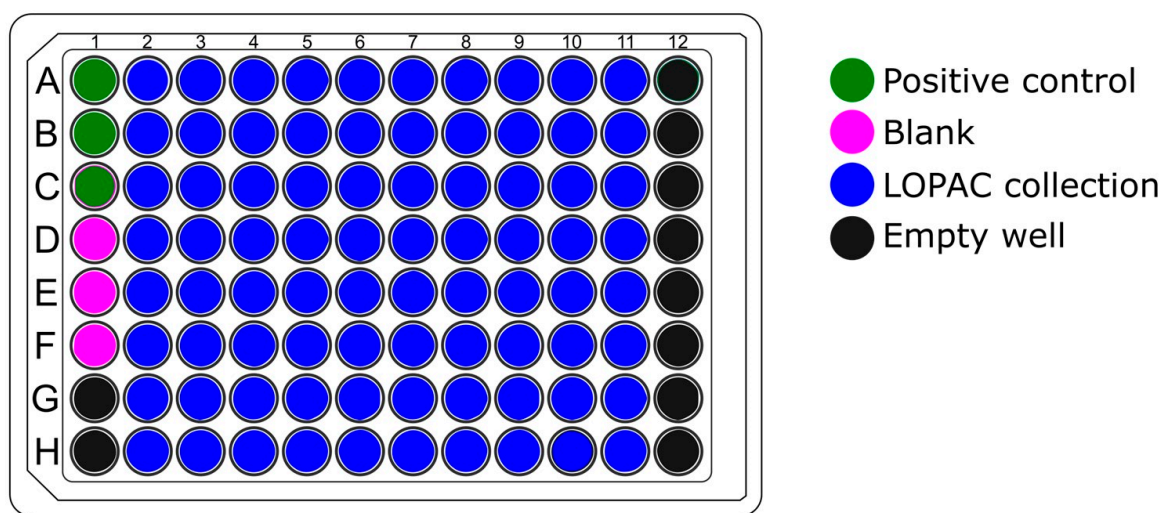

**Figure S1.** LOPAC<sup>1280</sup> screening plate layout: the LOPAC<sup>1280</sup> collection was arrayed across sixteen 96-well plates. Each plate contained three positive (no-inhibitor) controls (green), three blank wells (pink) and 80 wells containing compounds from the library (blue). The remaining wells were unused.

**A**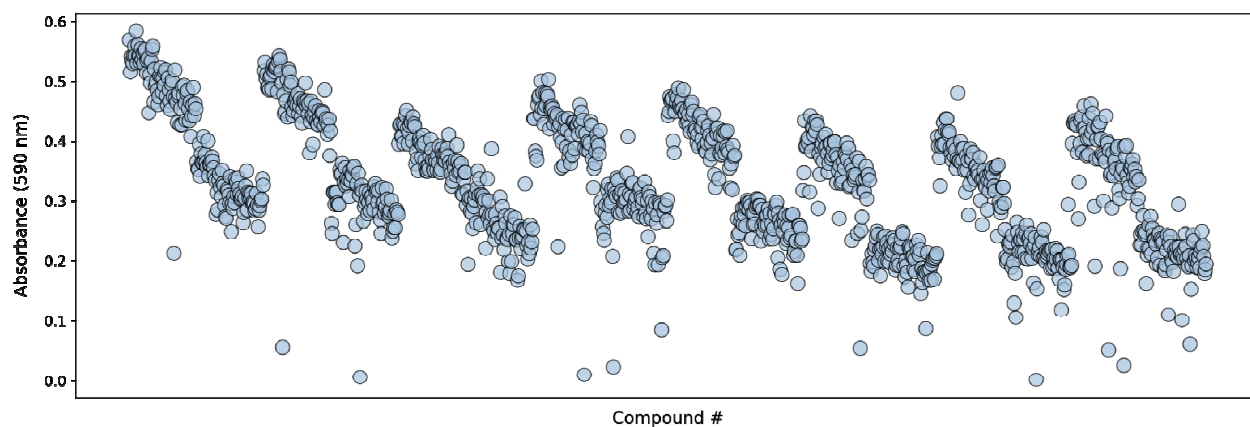**B**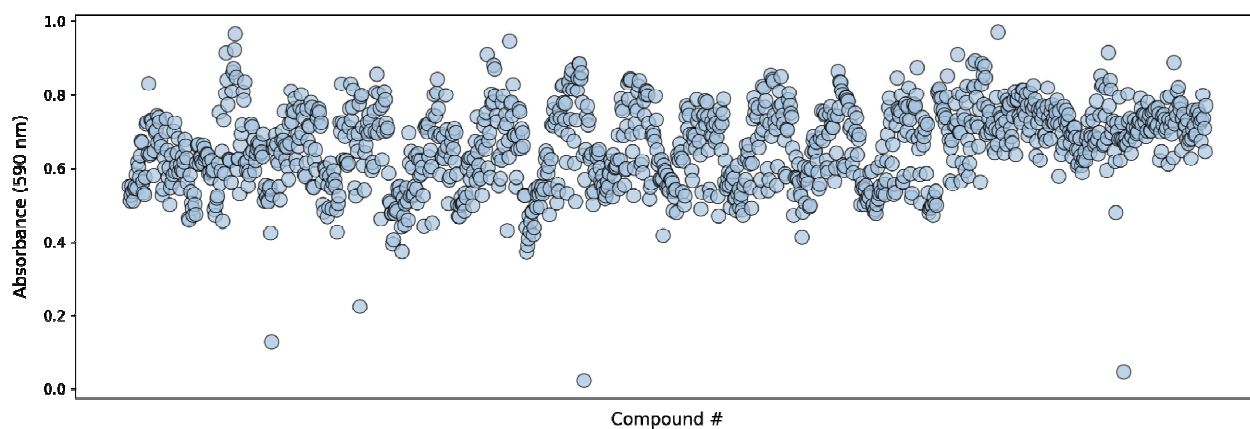

**Figure S2.** Raw values absorbance values of the LOPAC<sup>1280</sup> collection: **(A)** A<sub>590</sub> values derived post indigoidine synthesis by PptT-activated BpsA for 16 96-well plates, screened in pairs to identify candidate PptT inhibitors from the LOPAC<sup>1280</sup> collection. Clearly evident is the wave-like pattern arising due to the instability of PptT in aqueous media. **(B)** A<sub>590</sub> values derived post indigoidine synthesis for an equivalent set of 96-well plates to those presented in Panel A, only using pre-activated BpsA. These reactions did not contain PptT and correspondingly no wave-like pattern is discernible.

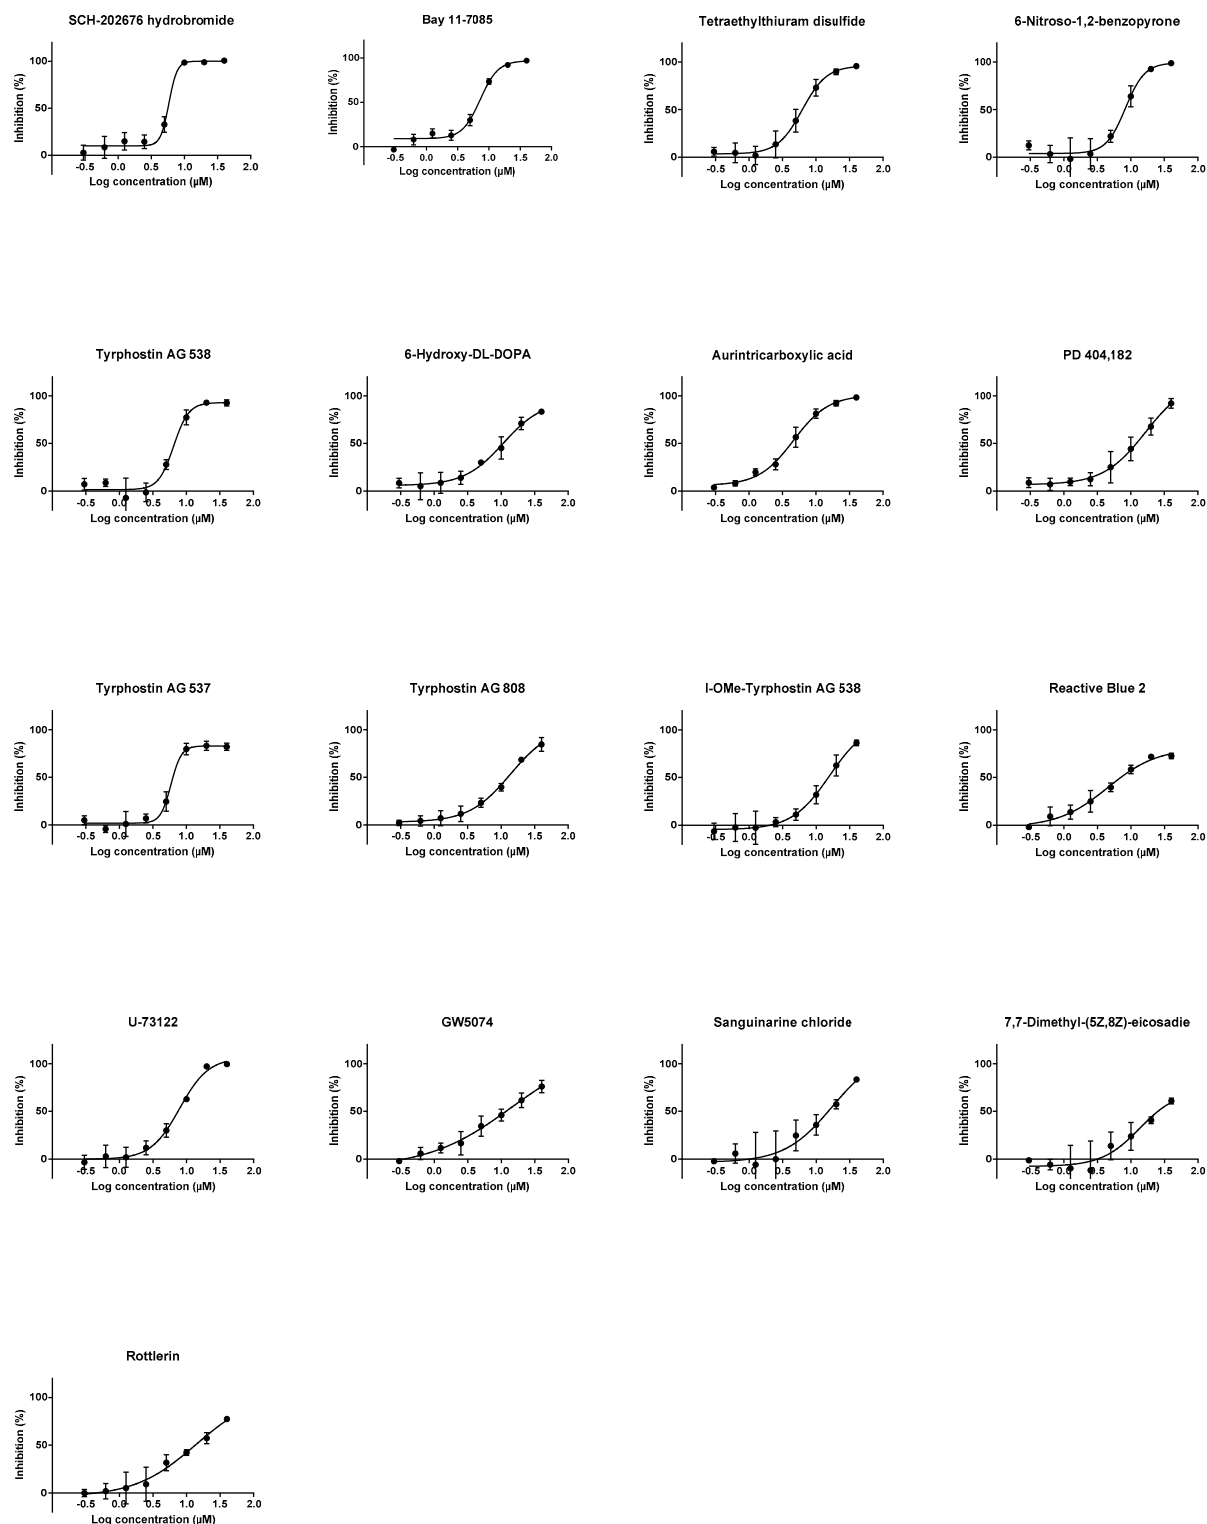

**Figure S3.** EC<sub>50</sub> values for top compounds: A two-fold serial dilution from 40 μM to 0.625 μM for each compound was established across individual rows of a 96 well plate. Graphpad Prism was then used to fit a four parameter dose-response curve to determine EC<sub>50</sub> values. In each case, data was derived from the mean of three independent replicates and error bars represent the standard deviation.

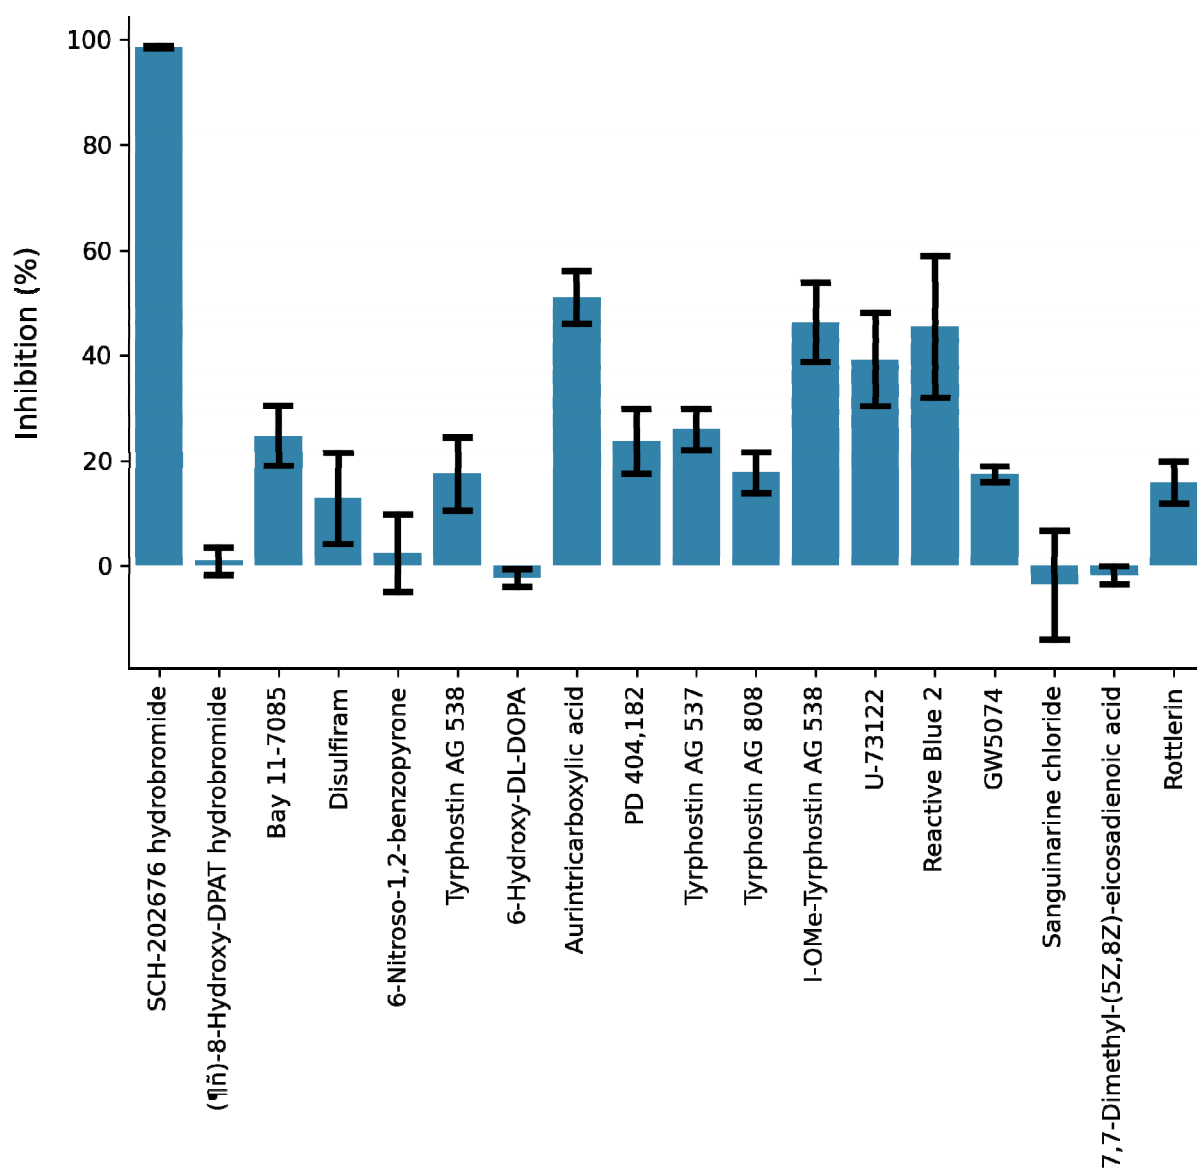

**Figure S4.** Inhibition of *holo*-BpsA at a candidate -inhibitor concentration of 40  $\mu$ M: The inhibition of *holo*-BpsA by compounds identified as candidate PptT inhibitors at 20  $\mu$ M was determined by re-screening at 40  $\mu$ M. In each case, data was derived from the mean of three independent replicates and error bars represent the standard deviation.

**A**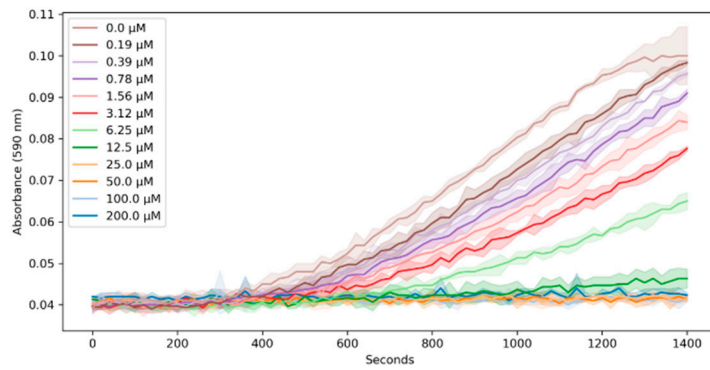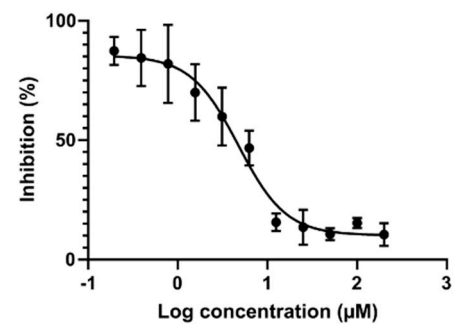**B**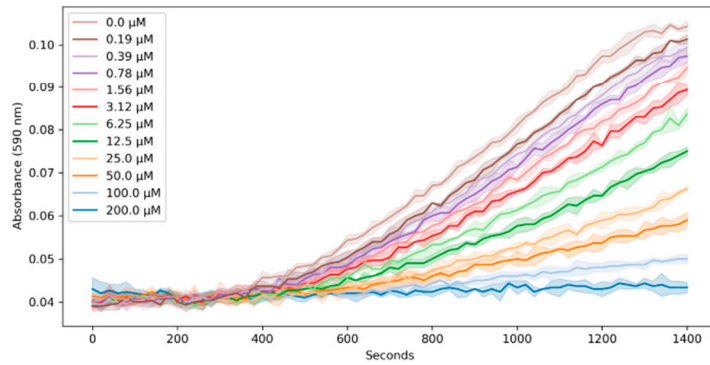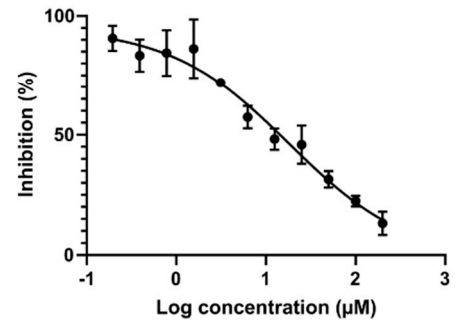

**Figure S5.** Kinetic determination of  $\text{EC}_{50}$  values: **(A)** The rate of BpsA activation by PptT diminishes with increasing levels of 6-NOBP. Data were recorded every 20 s and are the average of three replicates. The lighter shaded boundaries around each set of  $A_{590}$  data (left panel) represent one standard deviation. The right panel shows the graph used to derive  $\text{EC}_{50}$  values from the mean  $A_{590}$  data. Data was derived from the mean of three replicates, and the error bars in the right panel represent one standard deviation. **(B)** The rate of BpsA activation by PptT diminishes with increasing levels of Sanguinarine chloride. Data were recorded every 20 s and are the average of three replicates. The lighter shaded boundaries around each set of  $A_{590}$  data (left panel) represent one standard deviation. The right panel shows the graph used to derive  $\text{EC}_{50}$  values from the mean  $A_{590}$  data. Data was derived from the mean of three replicates, and the error bars in the right panel represent one standard deviation.
